# Supplementary material for: The socioeconomic burden of pediatric tuberculosis and role of child-sensitive social protection
Source: PubMed Central journal article supplement (PMC10675962; doi:10.1186/s12889-023-17084-7), 2023-11-25
Supplement: 12889_2023_17084_MOESM1_ESM.pdf [file 12889_2023_17084_MOESM1_ESM.pdf]

Additional file 1

File format: pdf

Title of data: Survey questions at baseline and follow up

Description of data: List of questions presented to participants and caregivers during study related to socioeconomic status and burden at the baseline and follow-up visits.

# SURVEY – INITIAL EVALUATION

---

## Socioeconomic Questions

Highest level of education mother achieved:

- None
- Primary
- Secondary
- Vocational
- University
- Don't know

---

Highest level of education father achieved:

- None
- Primary
- Secondary
- Vocational
- University
- Don't know

---

Highest level of education caregiver achieved:

- None
- Primary
- Secondary
- Vocational
- University
- Don't know

---

How many people live in your household?

- 1
- 2
- 3
- 4
- 5
- 6
- 7
- 8
- 9
- 10
- 11
- 12
- 13
- 14
- 15
- 16
- 17
- 18
- 19
- 20
- 21
- 22
- 23
- 24
- 25
- 26
- 27
- 28
- 29
- 30
- 31
- 32
- 33
- 34
- 35
- 36
- 37
- 38
- 39
- 40
- 41
- 42
- 43
- 44
- 45
- 46
- 47
- 48
- 49
- 50
- Don't Know

---

Who is the head of household?

- Mother
- Father
- Grandmother
- Grandfather
- Aunt
- Uncle
- Older sibling
- Cousin
- Other

If other, who is the head of household? \_\_\_\_\_

Who is the primary wage earner in the household?

- Mother
- Father
- Grandmother
- Grandfather
- Aunt
- Uncle
- Older sibling
- Cousin

Other

If other, who is the primary wage earner in the household? \_\_\_\_\_

How much total income does the household earn each month?

\_\_\_\_\_  
(In Uganda Shillings (UGX))

Does the child's primary caregiver earn income for the household?

- Yes
- No

How much income does the primary caregiver earn for the household each month?

\_\_\_\_\_  
(In Uganda Shillings (UGX))

**In your household, do you have:**

|                        | Yes                   | No                    | Not Applicable        | Don't know            |
|------------------------|-----------------------|-----------------------|-----------------------|-----------------------|
| Electricity Television | <input type="radio"/> | <input type="radio"/> | <input type="radio"/> | <input type="radio"/> |
| Motor cycle or scooter | <input type="radio"/> | <input type="radio"/> | <input type="radio"/> | <input type="radio"/> |
| Wardrobe               | <input type="radio"/> | <input type="radio"/> | <input type="radio"/> | <input type="radio"/> |
| CD/DVD Player          | <input type="radio"/> | <input type="radio"/> | <input type="radio"/> | <input type="radio"/> |

In general, do you feel that the household's finances have been negatively affected because of the child's

- Yes
- No illness?

**In particular, has the household been affected in any of the following ways because of the child's illness?**

|                                                    | Yes                   | No                    | Not Applicable        | Don't know            |
|----------------------------------------------------|-----------------------|-----------------------|-----------------------|-----------------------|
| The household lost income                          | <input type="radio"/> | <input type="radio"/> | <input type="radio"/> | <input type="radio"/> |
| The child had to miss school                       | <input type="radio"/> | <input type="radio"/> | <input type="radio"/> | <input type="radio"/> |
| Other children in the household had to miss school | <input type="radio"/> | <input type="radio"/> | <input type="radio"/> | <input type="radio"/> |

|                                                                                                               |                       |                       |                       |                       |
|---------------------------------------------------------------------------------------------------------------|-----------------------|-----------------------|-----------------------|-----------------------|
| The household had to sell livestock                                                                           | <input type="radio"/> | <input type="radio"/> | <input type="radio"/> | <input type="radio"/> |
| The household had to take out a loan                                                                          | <input type="radio"/> | <input type="radio"/> | <input type="radio"/> | <input type="radio"/> |
| The household had to sell other household assets like furniture, equipment, transportation                    | <input type="radio"/> | <input type="radio"/> | <input type="radio"/> | <input type="radio"/> |
| The child is falling behind in development (learning to speak, move, understand or interact with others, etc) | <input type="radio"/> | <input type="radio"/> | <input type="radio"/> | <input type="radio"/> |
| A member of the household had to miss work                                                                    | <input type="radio"/> | <input type="radio"/> | <input type="radio"/> | <input type="radio"/> |
| The household had to pay more for childcare                                                                   | <input type="radio"/> | <input type="radio"/> | <input type="radio"/> | <input type="radio"/> |

---

Do any other family or household members have TB?  Yes  No

---

Does the impact you describe include the cost of caring for another family member with TB (or child only)?  Child only  Everyone with TB  Not applicable

---

How much household income was lost because of the child's illness? \_\_\_\_\_

---

How many days of school has the child missed due to this illness? \_\_\_\_\_

---

How many days of school have other children in the household missed due to this illness? \_\_\_\_\_

---

How much money was taken out as a loan due to the child's illness? \_\_\_\_\_

---

How many days of work have household members had to miss because of the child's illness? \_\_\_\_\_

---

Approximately how much have you spent on childcare (beyond usual costs) due to the child's illness? \_\_\_\_\_

---

How many clinic visits did the child have for this illness BEFORE today? \_\_\_\_\_

---

Was the child tested for TB at previous visits?  Yes  No

---

Did you have to pay for TB tests at previous visits? Yes No

---

How much did you pay for the child's TB tests? \_\_\_\_\_

---

Did the child receive tests for NON-TB illnesses at previous visits?

- Yes  
 No

---

Did you have to pay for any NON-TB tests at previous visits?

- Yes  
 No

---

How much did you pay for the child's NON-TB tests?

\_\_\_\_\_

---

# SURVEY – 2 MONTH EVALUATION

## Socioeconomic Questions

Who is the head of household?

- Mother
- Father
- Grandmother
- Grandfather
- Aunt
- Uncle
- Older sibling
- Cousin
- Other

---

If other, who is the head of household?

\_\_\_\_\_

---

Who is the primary wage earner in the household?

- Mother
- Father
- Grandmother
- Grandfather
- Aunt
- Uncle
- Older sibling
- Cousin

---

If other, who is the primary wage earner in the household?

\_\_\_\_\_

---

How much total income does the household earn each month?

\_\_\_\_\_ (In Uganda Shillings (UGX))

---

Who is the primary caregiver for the child?

- Mother
- Father
- Grandmother
- Grandfather
- Aunt
- Uncle
- Older sibling
- Cousin

---

If other, who is the primary caregiver for the child?

\_\_\_\_\_

---

Does the child's primary caregiver earn income for the household?

- Yes
- No

---

How much income does the primary caregiver earn for the household each month?

\_\_\_\_\_ (In Uganda Shillings (UGX))

---

**In your household, do you have:**

|                        | Yes                   | No                    | Don't know            |
|------------------------|-----------------------|-----------------------|-----------------------|
| Electricity Television | <input type="radio"/> | <input type="radio"/> | <input type="radio"/> |
| Motor cycle or scooter | <input type="radio"/> | <input type="radio"/> | <input type="radio"/> |
| Wardrobe               | <input type="radio"/> | <input type="radio"/> | <input type="radio"/> |
| CD/DVD Player          | <input type="radio"/> | <input type="radio"/> | <input type="radio"/> |



**Since your initial visit with us, has the household been affected in any of the following ways because of the child's illness or its treatment?**

|                                                                                            | Yes                   | No                    | Don't Know            |
|--------------------------------------------------------------------------------------------|-----------------------|-----------------------|-----------------------|
| The household's finances have been affected                                                | <input type="radio"/> | <input type="radio"/> | <input type="radio"/> |
| The household lost income                                                                  | <input type="radio"/> | <input type="radio"/> | <input type="radio"/> |
| The child had to miss school                                                               | <input type="radio"/> | <input type="radio"/> | <input type="radio"/> |
| Other children in the household had to miss school                                         | <input type="radio"/> | <input type="radio"/> | <input type="radio"/> |
| The household had to sell livestock                                                        | <input type="radio"/> | <input type="radio"/> | <input type="radio"/> |
| The household had to take out a loan                                                       | <input type="radio"/> | <input type="radio"/> | <input type="radio"/> |
| The household had to sell other household assets like furniture, equipment, transportation | <input type="radio"/> | <input type="radio"/> | <input type="radio"/> |
| The child is falling behind developmentally                                                | <input type="radio"/> | <input type="radio"/> | <input type="radio"/> |
| A member of the household had to miss work                                                 | <input type="radio"/> | <input type="radio"/> | <input type="radio"/> |
| The household had to pay more for childcare                                                | <input type="radio"/> | <input type="radio"/> | <input type="radio"/> |

How much household income was lost because of the child's illness? \_\_\_\_\_

How many days of school has the child missed due to this illness? \_\_\_\_\_

How many days of school have other children in the household missed due to this illness? \_\_\_\_\_

How much money was taken out as a loan due to the child's illness? \_\_\_\_\_

How many days of work have household members had to miss because of the child's illness? \_\_\_\_\_

Approximately how much have you spent on childcare (beyond usual costs) due to the child's illness? \_\_\_\_\_
